# Supplementary material for: Screening of Gestational Diabetes and Its Risk Factors: Pregnancy Outcome of Women with Gestational Diabetes Risk Factors According to Glycose Tolerance Test Results
Source: MDPI journal article supplement (doi:10.3390/jcm11174953), 2022-08-23
Supplement: s1 [file s1]

**Table S1.** Data acquisition for the study in three time period.

| Parameter                       | Time Period               |                                                     |                                                     |
|---------------------------------|---------------------------|-----------------------------------------------------|-----------------------------------------------------|
|                                 | 2012                      | 2013–2015                                           | 2018                                                |
| <i>Basic characteristics</i>    |                           |                                                     |                                                     |
| Maternal age                    | Calculation based ID-code | Calculation based ID-code                           | Calculation based ID-code                           |
| Pre-pregnancy BMI               | Documented by midwife     | Patient reported and hospital database              | hospital database                                   |
| Number of previous deliveries   | NA                        | Patient reported and hospital database              | hospital database                                   |
| <i>GDM risk factors</i>         |                           |                                                     |                                                     |
| GDM previously                  | Documented by midwife     | Patient reported and hospital database              | hospital database                                   |
| Previous baby >4500g            | Documented by midwife     | Patient reported and hospital database              | hospital database                                   |
| DM among first degree relatives | Documented by midwife     | Patient reported and hospital database              | hospital database                                   |
| PCOS                            | Documented by midwife     | Patient reported and hospital database              | hospital database                                   |
| Fasting glucose >5.1mmol/L      | Laboratory database       | Laboratory database                                 | Laboratory database                                 |
| Polyhydramnion                  | Documented by midwife     | hospital database                                   | hospital database                                   |
| Glucosuria                      | Documented by midwife     | hospital database                                   | hospital database                                   |
| Gestational weight gain         | NA                        | Patient reported and hospital database              | hospital database                                   |
| Excessive weight gain           | Documented by midwife     | Calculation based weight gain and pre-pregnancy BMI | Calculation based weight gain and pre-pregnancy BMI |
| Suspicion to fetal macrosomia   | Documented by midwife     | hospital database                                   | hospital database                                   |
| <i>Outcome of pregnancy</i>     |                           |                                                     |                                                     |
| GDM                             | Laboratory database       | Laboratory and hospital database                    | Laboratory and hospital database                    |
| Hypertensive disorders          | NA                        | hospital database                                   | hospital database                                   |
| Gestational age at delivery     | hospital database         | hospital database                                   | hospital database                                   |
| Delivery mode                   | hospital database         | hospital database                                   | hospital database                                   |
| Birth parameters                | hospital database         | hospital database                                   | hospital database                                   |
| <i>Fetal macrosomia</i>         |                           |                                                     |                                                     |
| Shoulder dystocia               | hospital database         | hospital database                                   | hospital database                                   |
| Perineal tear ≥3 grade          | hospital database         | hospital database                                   | hospital database                                   |

Midwives completed GDM risk assessment check-list (pre-gestational BMI, GDM and/or of birth baby >4500g during previous pregnancy, DM among first-degree relatives, previous PCOS, abnormal fasting/random blood glucose, excessive weight gain, glucosuria, macrosomia or polyhydramnion detected at ultrasound scan) twice during the pregnancy. Detailed information about previous pregnancies and total weight gain during pregnancy is not available for this cohort. Patient reported data originate from questionnaires filled by themselves during the pregnancy. Data were revised and complemented when discrepancies between patient's report and medical data were detected. Data from hospital database derived directly from electronic records and no manual data entry was performed.

**Table S2.** Pregnancy course and outcome in women with GDM diagnosi.

| Outcome <sup>1</sup>                         | GDM in Total<br><i>n</i> = 423 | Only Diet <sup>2</sup><br><i>n</i> = 285 | Diet and Metformin<br>and/or Insulin <sup>2</sup><br><i>n</i> = 82 | Comparison between<br>Treatment Groups<br><i>p</i> -Value <sup>3</sup> |
|----------------------------------------------|--------------------------------|------------------------------------------|--------------------------------------------------------------------|------------------------------------------------------------------------|
| Maternal age (years)                         | 31 (22–39)                     | 30 (21–39)                               | 30 (23–38)                                                         | n.s                                                                    |
| Pre-pregnancy BMI (kg/m <sup>2</sup> )       | 26.4(19.2–37.9)                | 25.7 (19.1–36.5)                         | 29.1 (20.2–42.2)                                                   | $2.7 \times 10^{-3}$                                                   |
| Weight gain (0–23 g.w) (kg)                  | 5.0 (–3.0–13)                  | 5.0 (–2.0–13)                            | 6.0 (–4.0–16)                                                      | n.s                                                                    |
| Weight gain (24–42 g.w) (kg)                 | 8.0 (1.0–17)                   | 7.8 (1.6–17)                             | 8.0 (–2.0–19)                                                      | n.s                                                                    |
| Total weight gain (kg)                       | 13 (–0.4–29.1)                 | 13 (1.5–29)                              | 13 (–5.2–33.4)                                                     | n.s                                                                    |
| Gestational age at delivery (days)           | 276 (252–289)                  | 277 (257–290)                            | 274.5 (259–288)                                                    | <b><math>1.3 \times 10^{-3}</math></b>                                 |
| Birthweight (grams)                          | 3635 (2695–4430)               | 3602 (2780–4356)                         | 3573 (2780–4564)                                                   | n.s                                                                    |
| Birth centile                                | 82.6 (26.5–99.3)               | 79.9(26.5–98.8)                          | 82.3 (19.7–99.8)                                                   | n.s                                                                    |
| LGA <sup>4</sup>                             | 110 (26.0%)                    | 61 (21.4%)                               | 26 (31.7%)                                                         | $5.3 \times 10^{-2}$                                                   |
| SGA <sup>4</sup>                             | 4 (0.95%)                      | 2 (0.7%)                                 | 2 (2.4%)                                                           | n.s                                                                    |
| Cesarean section                             | 114 (27.0%)                    | 75 (26.3%)                               | 26 (31.7%)                                                         | n.s                                                                    |
| Preterm delivery                             | 27 (6.4%)                      | 17 (6.2%)                                | 3 (3.8%)                                                           | n.s                                                                    |
| Shoulder dystocia <sup>5</sup>               | 1/266 (0.4%) <sup>2</sup>      | 0/210 (0%)                               | 1/56 (1.8%)                                                        | n.s                                                                    |
| Perineal rupture $\geq 3$ grade <sup>5</sup> | 2/266 (0.8%) <sup>2</sup>      | 1/210 (0.5%)                             | 1/56 (1.8%)                                                        | n.s                                                                    |
| Preeclampsia                                 | 11 (2.6%)                      | 6 (2.1%)                                 | 4 (4.9%)                                                           | n.s                                                                    |
| Gestational hypertension                     | 25 (6.8%) <sup>2</sup>         | 19 (6.7%)                                | 6 (7.3%)                                                           | n.s                                                                    |

<sup>1</sup> Data are given as median (5th–95th percentiles) or number (percentage) when appropriate. <sup>2</sup> De-tailed data about GDM treatment was available for 2013–2015 and 2018 cohorts, and not for 56 women representing I dataset, recruited for antenatal care in 2012. <sup>3</sup> Wilcoxon rank-sum test was used for continuous variables and Chi2 test for categorical variables, statistical significance level adjusted according to Bonferron correction for 16 parametes and 2 groups  $0.05/32 < 1.6 \times 10^{-3}$ , parameters exceeding the level are shown in bold. <sup>4</sup> For the assignment of large or small-for-gestational-age (LGA or SGA, respectively) diagnosis, the fetal growth calculator based on INTERGROWTH-21st Project was applied to convert the newborn birthweight into gestational age and sex-adjusted centiles (20). Newborn was categorized as LGA in case the sex-and gestational age adjusted birth centile was more than 95 and SGA in case the sex-and gestational age adjusted birth centile was less than 10 centiles. <sup>5</sup> Percentage is calculated from vaginal deliveries only. BMI, body mass index; GDM gestational diabetes; g.w, gestational weeks.
